# Supplementary material
Source: PubMed Central journal article supplement (PMC7755242)
Supplement: AEM.02188-20-s0001.pdf [file AEM.02188-20-s0001.pdf]

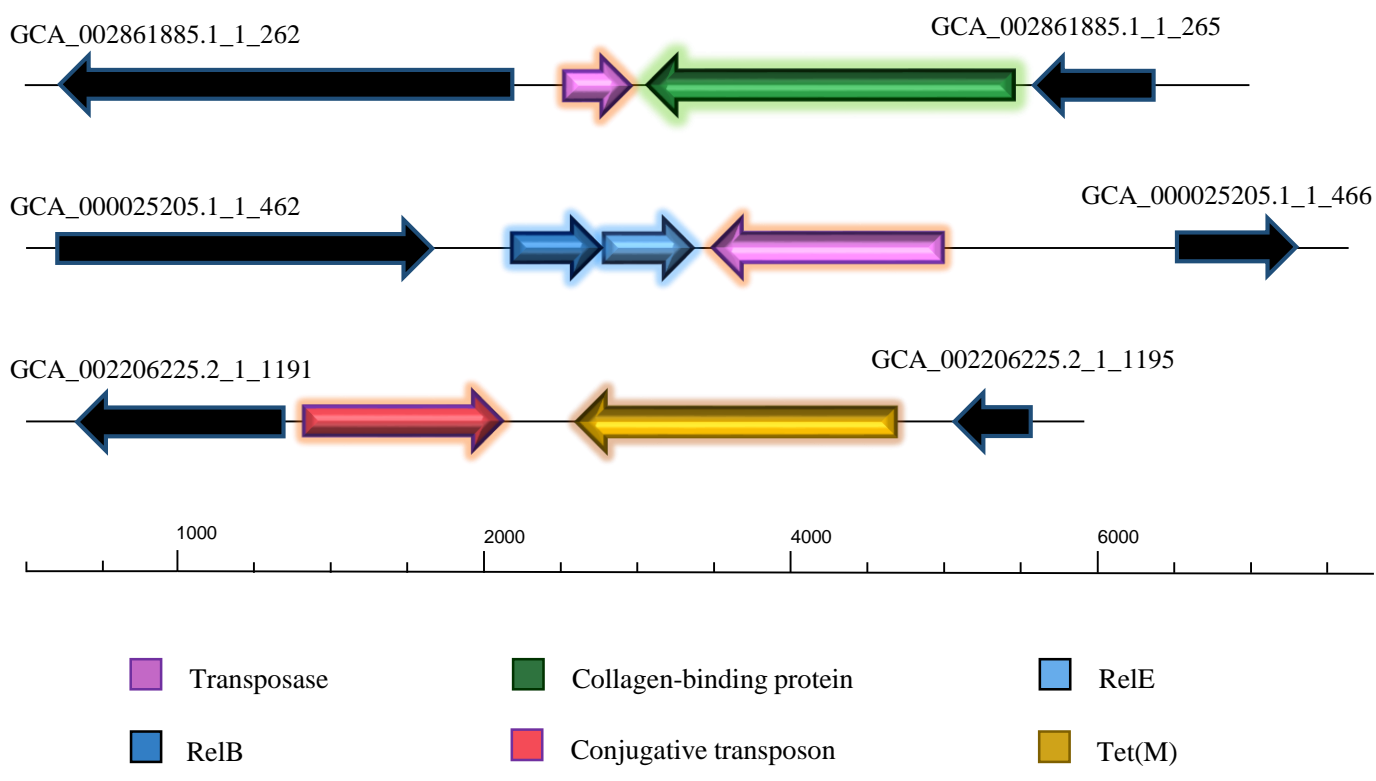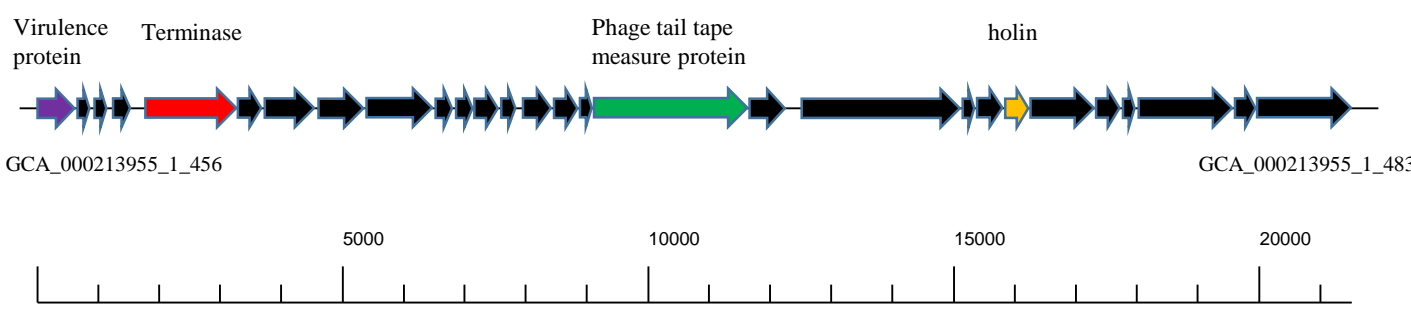

Figure S1

**Figure S1.** Genome regions containing putative prophages-like sequences and IS elements placed alongside the virulence factors. Different gene names are reported near to each genomic region. Each arrow indicates a gene and the different colors indicate the function of the gene product.
